# Supplementary material for: Lens on Tropical Sericulture Development in Indonesia: Recent Status and Future Directions for Industry and Social Forestry
Source: MDPI journal article supplement (doi:10.3390/insects13100913), 2022-10-08
Supplement: s1 [file s1]

**Table S1.** Silkworm hybridization in Indonesia.

| Product Name | Breeding                                                 | Breeders                                                                                                           | Advantages                                                                                                                                                                                                                   | Recognition as intellectual property rights                                                                                               |
|--------------|----------------------------------------------------------|--------------------------------------------------------------------------------------------------------------------|------------------------------------------------------------------------------------------------------------------------------------------------------------------------------------------------------------------------------|-------------------------------------------------------------------------------------------------------------------------------------------|
| Hybrid C-301 | Chinese race male and Japanese race female – (202 x 102) | PPUS Candirototo (Pati, Central Java)                                                                              | Adapts well to various climatic conditions; filament size: 758.7–904.2 m with a cocoon weight 1.39–1.48 g [52,75,77,86]                                                                                                      | The superior seeds are traded by Perum Perhutani, but no intellectual property rights are issued.                                         |
| Hybrid BS-08 | Japanese race male and Chinese race female – (805 x 806) | Sericulture Laboratory, Research and Development Agency, Ministry of Forestry                                      | High cocoon shell ratio with hatchability above 90%, filament size 1002–1251 m and cocoon shell ratio 23.00–25.04%                                                                                                           | Decree of the Minister of Forestry No. SK. 369/Menhut-VIII/2004 on October 8, 2004                                                        |
| Hybrid BS-09 | Chinese race male and Japanese race female – (808 x 807) | Sericulture Laboratory, Research and Development Agency, Ministry of Forestry                                      | Has good cocoon quality and filament strength and hatchability above 90% with a filament size of 1060–1216 m and a cocoon shell ratio of 21.28–23.49%. This hybrid is more resistant to pebrine disease and easy to maintain | Decree of the Minister of Forestry No. SK. 369/Menhut-VIII/2004 on October 8, 2004                                                        |
| Hybrid PS 01 | Chinese race male and Japanese race female – (804 x 927) | Sericulture Laboratory, Research and Development Agency, Ministry of Forestry                                      | Good and stable cocoon quality (cocoon shell weight: 0.38–0.44 g); high egg hatchability, more than 90%; good-quality filaments (filament size 808–1003 m) and also suitable for cultivation in high places [39]             | Minister of Forestry Decree no. SK 794/Menhut-II/2013 dated November 13, 2013                                                             |
| Hybrid SINAR | Chinese race male and Japanese race female – (804 x 102) | Sericulture Laboratory, - Forest Research, Development and Innovation Agency, Ministry of Environment and Forestry | Filament size up to 1102 m, suitable for maintenance in lowland areas with an altitude of 100–200 m above sea level                                                                                                          | Decree of the Minister of Environment and Forestry of the Republic of Indonesia No: SK.300/Menlhk/Setjen/KUM.1/4/2019 dated 24 April 2019 |

**Table S2.** The dynamics of government policy affecting silk development in Indonesia.

| Year | Policy                                                                                                                       | Description                                                                                                                                                                                                                    |
|------|------------------------------------------------------------------------------------------------------------------------------|--------------------------------------------------------------------------------------------------------------------------------------------------------------------------------------------------------------------------------|
| 1986 | Minister of Forestry Instruction No. 02/Menhut-II/86 dated January 3, 1986                                                   | The Crash of the Natural Silk Handling Program in South Sulawesi Province                                                                                                                                                      |
| 2002 | Decree of the Minister of Forestry No. 664/Kpts-II/2002 dated March 2, 2002                                                  | The Organization and Work Procedure of the Natural Silk Center.                                                                                                                                                                |
| 2006 | Joint Decree of 3 Ministers No. P.47/Menhut-II/2006 29/M-ENG/PER/6/2006 07/PER/M.KUKM/VI/2006                                | Fostering and Development of National Natural Libraries with Cluster Approach                                                                                                                                                  |
| 2016 | Regulation of the Ministry of Environment and Forestry of the Republic of Indonesia Number P. 14 /Menlhk/Setjen/OTL.O/I/2016 | Organization and Work Procedures of Balai Social Forestry and Environmental Partnership                                                                                                                                        |
| 2017 | Regulation of the Ministry of Environment and Forestry of the Republic of Indonesia Number P.37/MenLHK/Setjen/Kum.1/6/2017   | Improving the quality and quantity of silkworm eggs, ensuring the quality and availability of silk cocoons, regulating the procurement and circulation of silkworm eggs                                                        |
| 2021 | Government Regulation (PP) and its derivatives Number 23 of 2021                                                             | Concerning forestry administration, it opens opportunities for forest area permit holders to develop natural silk with multiple forestry businesses through Forest Utilization Business Permits (PBPH) in one forest landscape |
| 2021 | Regulation of the ministry of the environmental of Social Forestry of Indonesia Number 09 of 2021                            | Concerning Social Forestry, it enables a Farmer Business Group of Mulberry growers and the development its derivative products                                                                                                 |
